# Supplementary material for: Chemoprophylactic Assessment of Combined Intranasal SARS-CoV-2 Polymerase and Exonuclease Inhibition in Syrian Golden Hamsters
Source: MDPI journal article supplement (doi:10.3390/v15112161), 2023-10-27
Supplement: s1 [file s1]

**Supplementary Table S1.** Relevant histological changes and SARS-CoV-2 nucleoprotein expression in Syrian hamsters after intranasal infection with 10<sup>4</sup> PFU SARS-CoV-2 B.1.1.7 (Alpha) and euthanised at 7 days post infection (“Infected #1-#6), and in hamsters that were exposed to contact transmission (CT) for 7 days and treated intranasally with saline, PIB, FVP, FVP+PIB, RDV, or RDV+PIB for 7 days (from day -1 to day 6).

NB: In all animals the lungs exhibited a variable degree of increased interstitial cellularity due to leukocyte influx. This is not specifically mentioned in the histological descriptions.

| Animal group + no | Treatment, exposure                  | Histological changes and viral antigen expression (lung)                                                                                                                                                                                                                                                                                                                                                                                                                             | Virology (PCR) <sup>1</sup>                |
|-------------------|--------------------------------------|--------------------------------------------------------------------------------------------------------------------------------------------------------------------------------------------------------------------------------------------------------------------------------------------------------------------------------------------------------------------------------------------------------------------------------------------------------------------------------------|--------------------------------------------|
| Infected #1       | Infected                             | <b>Lung (HE):</b> mf to coalescing consolidated areas with type II pc/BEC hyperplasia, leukocyte infiltration <sup>2</sup> and some deg cells; mild pa edema, mild pv LC infiltration<br><b>vAg:</b> a few pos macrophages and very small patches of alveoli with pos AEC                                                                                                                                                                                                            | S: 260191<br>N: 19356510<br>L: 105225      |
| Saline #1         | Saline;<br>CT from Infected #1       | <b>Lung (HE):</b> bronchioles with rare individual deg BEC and mild (sub)epithelial leukocyte infiltration; extensive coalescing areas of alveoli with desquamed AEC/AM, some fibrin, activated type II pc, some syncytial cells and some deg cells, a few LC and NL; mild vascular and pv leukocyte infiltration and pa edema<br><b>vAg:</b> rare pos BEC; multiple large patches of alveoli with pos AEC                                                                           | S: 71551<br>N: 4588954<br>L: 214215063     |
| Saline #2         | Saline;<br>CT from Infected #1       | <b>Lung (HE):</b> bronchioles with rare individual deg BEC and mild (sub)epithelial leukocyte infiltration; mf consolidated areas with type II pc/BEC hyperplasia, leukocyte infiltration and some deg cells; mf coalescing areas of alveoli with desquamed AEC/AM, some fibrin, activated type II pc, some syncytial cells and some deg cells, a few LC and NL; mild vascular infiltration and pa edema<br><b>vAg:</b> rare pos BEC; multiple large patches of alveoli with pos AEC | S: 925835<br>N: 13001195<br>L: 255314234   |
| Saline #3         | Saline;<br>CT from Infected #1       | <b>Lung (HE):</b> mf areas of alveoli with desquamed AEC/AM, alveolar edema, activated type II pc, some syncytial cells and some deg cells; other areas with activated type II pc, a few syncytial cells, macrophages, LC and deg cells; mild to mod vascular leukocyte infiltration<br><b>vAg:</b> multiple large patches of alveoli with pos AEC                                                                                                                                   | S: 63743657<br>N: 11071723<br>L: 130573481 |
| Saline #4         | Saline;<br>CT from Infected #1       | <b>Lung (HE):</b> mf coalescing areas of alveoli with desquamed AEC/AM, some fibrin, activated type II pc, some syncytial cells, some deg cells, a few LC and NL; small consolidated areas with activated type II pc and focal type II pc/BEC hyperplasia; mild vascular infiltration and pa edema<br><b>vAg:</b> rare pos BEC; multiple large patches of alveoli with pos AEC                                                                                                       | S: 64771<br>N: 13931410<br>L: 120151650    |
| Saline #5         | Saline;<br>CT from Infected #1       | <b>Lung (HE):</b> mf coalescing areas of alveoli with desquamed AEC/AM, some fibrin, activated type II pc, some syncytial cells, some deg cells, a few LC and NL; mf consolidated areas with activated type II pc and type II pc/BEC hyperplasia; mild vascular infiltration and pa edema<br><b>vAg:</b> small patches of alveoli with pos AEC                                                                                                                                       | S: 166482<br>N: 71845150<br>L: 130309340   |
| Infected #2       | Infected                             | <b>Lung (HE):</b> mf to coalescing consolidated areas with with activated type II pc and type II pc/BEC hyperplasia, a few syncytial cells, mod numbers of macrophages and a few NL and deg cells; mild to mod vascular infiltration and pa edema; mild pv LC infiltration<br><b>vAg:</b> rare individual and small patches of alveoli with pos AEC                                                                                                                                  | S: 53452<br>N: 1553459<br>L: 110368        |
| PIB #1            | Pibrentasvir;<br>CT from Infected #2 | <b>Lung (HE):</b> mf to coalescing consolidated areas with focal type II pc/BEC hyperplasia, macrophages, a few NL and deg cells, focal areas with desquamation of AEC/AM and some syncytial cells; mild to mod leukocyte emigration and pv infiltration<br><b>vAg:</b> numerous small patches of alveoli with pos AEC (within and outside areas of desquamation)                                                                                                                    | S: 58937939<br>N: 240222<br>L: 33935538    |
| PIB #2            | Pibrentasvir;<br>CT from Infected #2 | <b>Lung (HE):</b> mf, mainly loosely consolidated areas with activated type II pc and focal type II pc/BEC hyperplasia, mod numbers of macrophages, a few NL and deg cells; mild to mod vascular infiltration, mild pv LC infiltration<br><b>vAg:</b> abundant variably sized patches of alveoli with pos AEC (outside, in the periphery of and within consolidated areas)                                                                                                           | S: 12774<br>N: 1496389<br>L: 21571524      |

|             |                                                            |                                                                                                                                                                                                                                                                                                                                                                                                                                                                                                                |                                           |
|-------------|------------------------------------------------------------|----------------------------------------------------------------------------------------------------------------------------------------------------------------------------------------------------------------------------------------------------------------------------------------------------------------------------------------------------------------------------------------------------------------------------------------------------------------------------------------------------------------|-------------------------------------------|
| PIB #3      | Pibrentasvir;<br>CT from<br>Infected #2                    | <b>Lung (HE):</b> mf to coalescing consolidated areas with type II pc/BEC hyperplasia, macrophages, a few NL and deg cells, focal areas with desquamation of AEC/AM and some syncytial cells; mild to mod vascular and pv LC infiltration, mild pa edema<br><b>vAg:</b> abundant variably sized patches of alveoli with pos AEC (outside, in the periphery of and within consolidated areas)                                                                                                                   | S: 75551<br>N: 10667159<br>L: 32116347    |
| PIB #4      | Pibrentasvir;<br>CT from<br>Infected #2                    | <b>Lung (HE):</b> mf to coalescing consolidated areas with type II pc/BEC hyperplasia, macrophages, a few NL and deg cells, focal areas with desquamation of AEC/AM and some syncytial cells; mild to mod vascular and pv LC infiltration, mild pa edema<br><b>vAg:</b> extensive, mainly large patches of alveoli with pos AEC (outside and in periphery of consolidated areas)                                                                                                                               | S: 58071<br>N: 9445262<br>L: 16032641     |
|             |                                                            |                                                                                                                                                                                                                                                                                                                                                                                                                                                                                                                |                                           |
| Infected #3 | Infected                                                   | <b>Lung (HE):</b> mf to coalescing consolidated areas with type II pc/BEC hyperplasia, leukocyte infiltration and some deg cells; mod pa edema; mild pv LC-dom leukocyte infiltration<br><b>vAg:</b> a few individual pos AEC and macrophages in consolidated areas, several small disseminated patches of alveoli with pos AEC                                                                                                                                                                                | S: 50238183<br>N: 4545371<br>L: 110021    |
| FVP #1      | Favipiravir;<br>CT from<br>Infected #3                     | <b>Lung (HE):</b> mf areas with desquamation of AEC/AM, macrophages, NL, some syncytial cells and some deg cells; mild to mod LC-dom arteritis and pa infiltration<br><b>vAg:</b> rare individual intact pos BEC; extensive large patches of alveoli with pos AEC                                                                                                                                                                                                                                              | S: 717120<br>N: <LOD<br>L: 45555269       |
| FVP #2      | Favipiravir;<br>CT from<br>Infected #3                     | <b>Lung (HE):</b> bronchioles with individual deg EC; mf areas with desquamation of AEC/AM, macrophages, NL, some syncytial cells and some deg cells; focal areas of type II pc/BEC hyperplasia; mild to mod LC-dom vascular and pa infiltration<br><b>vAg:</b> rare individual intact and deg pos BEC; mf disseminated small to large patches of alveoli with pos AEC                                                                                                                                         | S: <LOD<br>N: 16107403<br>L: 105791946    |
| FVP #3      | Favipiravir;<br>CT from<br>Infected #3                     | <b>Lung (HE):</b> very widespread desquamation of AEC/AM, with fibrin, macrophages, NL, some syncytial cells and some deg cells in alveoli, alveolar edema and extensive alveolar hemorrhage; mild pv LC-dom infiltration<br><b>vAg:</b> rare individual intact and deg pos BEC; very widespread disseminated and coalescing large patches of alveoli with pos AEC                                                                                                                                             | S: 44627<br>N: 9746003<br>L: 66193065     |
| FVP #4      | Favipiravir;<br>CT from<br>Infected #3                     | <b>Lung (HE):</b> very widespread desquamation of AEC/AM, with fibrin, macrophages, NL, some syncytial cells and some deg cells in alveoli, alveolar edema and mf alveolar hemorrhage; focal consolidated areas with type II pc/BEC hyperplasia and leukocyte infiltration; mild pv LC-dom infiltration<br><b>vAg:</b> mf disseminated variably sized patches of alveoli with pos AEC                                                                                                                          | S: <LOD<br>N: 23753666<br>L: 55222081     |
|             |                                                            |                                                                                                                                                                                                                                                                                                                                                                                                                                                                                                                |                                           |
| Infected #4 | Infected                                                   | <b>Lung (HE):</b> mf to coalescing consolidated areas with type II pc/BEC hyperplasia, leukocyte infiltration and some deg cells; mod pa edema; mild pv LC-dom leukocyte infiltration<br><b>vAg:</b> a few individual pos AEC and macrophages in consolidated areas, a few mod sized disseminated patches of alveoli with pos AEC                                                                                                                                                                              | S: 20110<br>N: 8413686<br>L: 160505       |
| FVP+PIB #1  | Favipiravir and<br>Pibrentasvir;<br>CT from<br>Infected #4 | <b>Lung (HE):</b> mf areas with desquamation of AEC/AM, some deg cells, occ syncytial cells, some leukocytes; small consolidated areas with type II pc/BEC hyperplasia, leukocyte infiltration and some deg cells; mild to mod pv LC-dom leukocyte infiltration<br><b>vAg:</b> many variably sized disseminated patches of alveoli with pos AEC                                                                                                                                                                | S: 2268658<br>N: 2941343<br>L: 29975435   |
| FVP+PIB #2  | Favipiravir and<br>Pibrentasvir;<br>CT from<br>Infected #4 | <b>Lung (HE):</b> bronchioles with occ deg EC and desquamated EC in lumen, mild (sub)epithelial LC-dom infiltration; mf areas with desquamation of AEC/AM, some deg cells, occ syncytial cells, some leukocytes; small consolidated area with type II pc/BEC hyperplasia, leukocyte infiltration and some deg cells; mild to mod pv LC-dom leukocyte infiltration<br><b>vAg:</b> most bronchioles with several individual and patches of intact pos EC; several variably sized patches of alveoli with pos AEC | S: 36979666<br>N: 4151342<br>L: 107999927 |

|             |                                                   |                                                                                                                                                                                                                                                                                                                                                                                                                                               |                                                |
|-------------|---------------------------------------------------|-----------------------------------------------------------------------------------------------------------------------------------------------------------------------------------------------------------------------------------------------------------------------------------------------------------------------------------------------------------------------------------------------------------------------------------------------|------------------------------------------------|
| FVP+PIB #3  | Favipiravir and Pibrentasvir; CT from Infected #4 | <b>Lung (HE):</b> mf to coalescing consolidated areas with type II pc/BEC hyperplasia, leukocyte infiltration and some deg cells; some areas with desquamation of AEC/AM, some deg cells, occ syncytial cells, some leukocytes; mild pa edema; mild vascular and pv LC-dom leukocyte infiltration<br><b>vAg:</b> a few individual pos AEC and macrophages in consolidated areas, widespread large patches of alveoli with pos AEC             | S: 103771<br>N: 14027330<br>L: <LOD            |
| FVP+PIB #4  | Favipiravir and Pibrentasvir; CT from Infected #4 | <b>Lung (HE):</b> mf to coalescing consolidated areas with type II pc/BEC hyperplasia, leukocyte infiltration and some deg cells; some areas with desquamation of AEC/AM, some deg cells, occ syncytial cells, some leukocytes; mild pa edema; mild vascular and pv LC-dom leukocyte infiltration<br><b>vAg:</b> a few individual pos AEC and macrophages in consolidated areas, a few disseminated mod sized patches of alveoli with pos AEC | S: 477534<br>N: 28217555<br>L: 56590693        |
| Infected #5 | Infected                                          | <b>Lung (HE):</b> mf to coalescing consolidated areas with activated type II pc and type II pc/BEC hyperplasia, a few syncytial cells, mod numbers of macrophages, a few NL and deg cells; focal alveolar edema; mild to mod vascular infiltration and pa edema; mild pv LC-dom infiltration<br><b>vAg:</b> a few individual and small patches of alveoli with pos AEC                                                                        | S: 42575<br>N: 43140212511<br>L: 8736570121    |
| RDV #1      | Remdesivir; CT from Infected #5                   | <b>Lung (HE):</b> widespread activated type II pc; occ syncytial cells<br><b>vAg:</b> neg                                                                                                                                                                                                                                                                                                                                                     | S: <LOD<br>N: <LOD<br>L: <LOD                  |
| RDV #2      | Remdesivir; CT from Infected #5                   | <b>Lung (HE):</b> mf extensive areas with desquamation of AEC/AM, macrophages, NL and deg cells, with mild focal type II pc/BEC hyperplasia; very mild (peri)bronchial LC infiltration; mod LC-dom vascular and pv infiltration<br><b>vAg:</b> a few individual pos intact BEC; several variably sized patches of alveoli with pos AEC                                                                                                        | S: <LOD<br>N: <LOD<br>L: <LOD                  |
| RDV #3      | Remdesivir; CT from Infected #5                   | <b>Lung (HE):</b> focal areas with desquamation of AEC/AM, activated type II pc, NL and deg cells; mild (peri)arterial LC-dom infiltration<br><b>vAg:</b> several bronchioles with a few to numerous intact pos EC and a few pos deg cells in lumen; one focal area of alveoli with pos AEC                                                                                                                                                   | S: <LOD<br>N: <LOD<br>L: 201109102313          |
| RDV #4      | Remdesivir; CT from Infected #5                   | <b>Lung (HE):</b> focal subpleural area with desquamation of AEC/AM, macrophages, NL and deg cells; small focal consolidated area with type II pc/BEC hyperplasia, a few deg cells and a few NL; mild (peri)arterial LC infiltration<br><b>vAg:</b> one large area (desquamative lesion) of alveoli with pos AEC                                                                                                                              | S: <LOD<br>N: <LOD<br>L: 25667286385           |
| Infected #6 | Infected                                          | <b>Lung (HE):</b> mf to coalescing consolidated areas with activated type II pc and type II pc/BEC hyperplasia, focal desquamation of AEC/AM, a few syncytial cells, mod numbers of macrophages, a few NL and deg cells; mild to mod LC-dom arteritis and pa infiltration, mod pa edema; mild pv LC infiltration<br><b>vAg:</b> a few small patches of alveoli with pos AEC                                                                   | S: 111238<br>N: 1707945<br>L: <LOD             |
| RDV+PIB #1  | Remdesivir and Pibrentasvir; CT from Infected #6  | <b>Lung (HE):</b> a few small focal areas with desquamation of AEC/AM, leukocyte infiltration, activated type II pc and occ deg cells<br><b>vAg:</b> neg                                                                                                                                                                                                                                                                                      | S: <LOD<br>N: <LOD<br>L: 22827806270           |
| RDV+PIB #2  | Remdesivir and Pibrentasvir; CT from Infected #6  | <b>Lungs:</b> focal consolidated areas with activated type II pc and type II pc/BEC hyperplasia, occ syncytial cells, macrophages and LC, occ deg cells; focal areas with desquamation of AEC/AM, leukocyte infiltration and activated type II pc; mild to mod pb LC-dom infiltration<br><b>vAg:</b> very rare individual pos intact BEC and AEC                                                                                              | S: <LOD<br>N: <LOD<br>L: <LOD                  |
| RDV+PIB #3  | Remdesivir and Pibrentasvir; CT from Infected #6  | <b>Lung (HE):</b> focal consolidated area with activated type II pc and type II pc/BEC hyperplasia, occ syncytial cells, macrophages and LC, occ deg cells; smaller focal areas with desquamation of AEC/AM, leukocyte infiltration and activated type II pc; mod pb LC-dom infiltration<br><b>vAg:</b> several bronchioles with several to numerous pos EC                                                                                   | S: 848238<br>N: 523848409877<br>L: 28732905109 |

|            |                                                  |                                                                                                          |                               |
|------------|--------------------------------------------------|----------------------------------------------------------------------------------------------------------|-------------------------------|
| RDV+PIB #4 | Remdesivir and Pibrentasvir; CT from Infected #6 | <b>Lung (HE):</b> multifocal activated type II pc; random small macrophage aggregates<br><b>vAg:</b> neg | S: <LOD<br>N: <LOD<br>L: <LOD |
|------------|--------------------------------------------------|----------------------------------------------------------------------------------------------------------|-------------------------------|

**Legend:** AEC – alveolar epithelial cells; AM – alveolar macrophages; BEC – bronchiolar epithelial cells; deg – degenerate; EC – epithelial cells; FVP – Favipiravir; HE – histological features assessed in a hematoxylin-eosin stained section; LC – lymphocyte; mf – multifocal; mod – moderate; neg – negative; NL – neutrophils; NT – nasal turbinates; LC – lymphocytes; LC-dom – lymphocyte dominated; LOD – level of detection; occ – occasional; pb – peribronchiolar; pc – pneumocytes; PF – proteinaceous fluid; PIB – Pibrentasvir; pos – positive; pv – perivascular; RDV – Remdesivir; vAg – viral antigen

<sup>1</sup> PCR: Copies of viral N-RNA/μg of RNA relative to 18S, for each animal determined in throat swabs (S), nasal turbinates (N) and lungs (L) at day 7.

<sup>2</sup> leukocyte infiltration/leukocyte infiltrates: if not further specified, this implies macrophages, fewer lymphocytes and variable numbers of neutrophils

**Supplemental Table S2.** Average viral RNA levels (copies of N-RNA/μg of RNA relative to 18S) in throat swabs (day 1, 3, 5, and 7), nasal turbinate (day 7) and right lung (day 7) for groups treated with saline, PIB, FVP, FVP+PIB, RDV, and RDV+PIB. In parenthesis, the p value of each group in comparison to the saline group. Values significantly lower than in the saline group are shown in bold (\* =  $P \leq 0.05$ , \*\* =  $P \leq 0.01$ , nonparametric Mann-Whitney test, one-tailed).

| Group   | Throat swabs      |                                  |                                                     |                                                     | Nasal turbinate (day 7)                             | Right lung (day 7)                                   |
|---------|-------------------|----------------------------------|-----------------------------------------------------|-----------------------------------------------------|-----------------------------------------------------|------------------------------------------------------|
|         | Day 1             | Day 3                            | Day 5                                               | Day 7                                               |                                                     |                                                      |
| Saline  | <LOD              | $7.3 \times 10^7$                | $4.3 \times 10^8$                                   | $1.3 \times 10^7$                                   | $2.3 \times 10^7$                                   | $1.7 \times 10^8$                                    |
| PIB     | <LOD<br>(P = 0.5) | $1.9 \times 10^7$<br>(P = 0.365) | $1.5 \times 10^8$<br>(P = 0.365)                    | $1.5 \times 10^7$<br>(P = 0.206)                    | <b><math>5.5 \times 10^6</math></b><br>(*P = 0.032) | <b><math>2.6 \times 10^7</math></b><br>(**P = 0.008) |
| FVP     | <LOD<br>(P = 0.5) | $8.4 \times 10^6$<br>(P = 0.143) | $2.1 \times 10^7$<br>(P = 0.278)                    | <b><math>1.9 \times 10^5</math></b><br>(*P = 0.048) | $1.2 \times 10^7$<br>(P = 0.452)                    | <b><math>6.8 \times 10^7</math></b><br>(**P = 0.008) |
| FVP+PIB | <LOD<br>(P = 0.5) | $6.5 \times 10^8$<br>(P = 0.365) | $5.4 \times 10^8$<br>(P = 0.278)                    | $9.9 \times 10^6$<br>(P = 0.279)                    | $1.2 \times 10^7$<br>(P = 0.365)                    | <b><math>4.9 \times 10^7</math></b><br>(**P = 0.008) |
| RDV     | <LOD<br>(P = 0.5) | <LOD<br>(**P = 0.008)            | <LOD<br>(**P = 0.008)                               | <LOD<br>(**P = 0.008)                               | <LOD<br>(**P = 0.008)                               | $5.7 \times 10^{10}$<br>(P = 0.5)                    |
| RDV+PIB | <LOD<br>(P = 0.5) | <LOD<br>(**P = 0.008)            | <b><math>2.2 \times 10^5</math></b><br>(*P = 0.016) | $2.1 \times 10^5$<br>(P = 0.056)                    | $1.3 \times 10^{11}$<br>(P = 0.143)                 | $1.3 \times 10^{10}$<br>(P = 0.5)                    |

**Supplementary Table S3.** Individual hamsters exposed to contact transmission (CT) for 7 days and treated intranasally with FVP, FVP+PIB, RDV, or RDV+PIB for 7 days (from day -1 to day 6) that were tested negative for SARS-CoV-2 infection in one or more of the different detection approaches. NB: All saline and PIB treated hamsters tested positive in all assays.

| Treatment | Animal no (#)     | PCR <sup>1</sup> |                 |      | <i>In situ</i> <sup>2</sup> |           |
|-----------|-------------------|------------------|-----------------|------|-----------------------------|-----------|
|           |                   | Tracheal swab    | Nasal turbinate | Lung | IH (vNP)                    | Histology |
| FVP       | 1                 | +                | -               | +    | +                           | +         |
|           | 2                 | -                | +               | +    | +                           | +         |
|           | 4                 | -                | +               | +    | +                           | +         |
| FVP+PIB   | 3                 | +                | -               | -    | +                           | +         |
| RDV       | 1 <sup>α, γ</sup> | -                | -               | -    | -                           | (+)       |
|           | 2 <sup>α, β</sup> | -                | -               | -    | +                           | +         |
|           | 3 <sup>α, β</sup> | -                | -               | +    | +                           | +         |
|           | 4 <sup>α, β</sup> | -                | -               | +    | +                           | +         |
| RDV+PIB   | 1 <sup>α, β</sup> | -                | -               | +    | -                           | (+)       |
|           | 2 <sup>α, β</sup> | -                | -               | -    | (+)                         | +         |
|           | 4 <sup>α, γ</sup> | -                | -               | -    | -                           | (+)       |

**Legend:** FVP – Favipiravir; IH - immunohistology; PIB – Pibrentasvir; RDV – Remdesivir; vNP – viral, i.e. SARS-CoV-2 nucleoprotein

<sup>1</sup> PCR: Copies of viral N-RNA/μg of RNA relative to 18S, for each animal determined in throat swabs (S), nasal turbinates (N) and lungs (L) at day 7.

<sup>2</sup> *In situ*: detection of viral antigen by immunohistology (IH) or histological changes consistent with SARS-CoV-2 infection (consolidated areas with focal hyperplasia of type II pneumocytes/bronchial epithelial cells and/or areas of alveoli with desquamated alveolar epithelial cells/alveolar macrophages, presence of activated type II pneumocytes, evidence of syncytial cells and of degenerate cells). Grading for IH: - negative (no viral antigen detected); (+) very rare individual positive alveolar and/bronchiolar epithelial cells; + variable amount of alveoli with positive alveolar epithelial cells (and positive bronchiolar epithelial cells). Grading for Histology: (+) minimal changes consistent with SARS-CoV-2 infection (increased interstitial cellularity, presence of activated type II pneumocytes; + changes consistent with SARS-CoV-2 infection, as defined above.

<sup>α</sup> No evidence of viral shedding at the time of death.

<sup>β</sup> Evidence of pulmonary infection (PCR, IH and/or histology).

<sup>γ</sup> Infection of animal not confirmed.



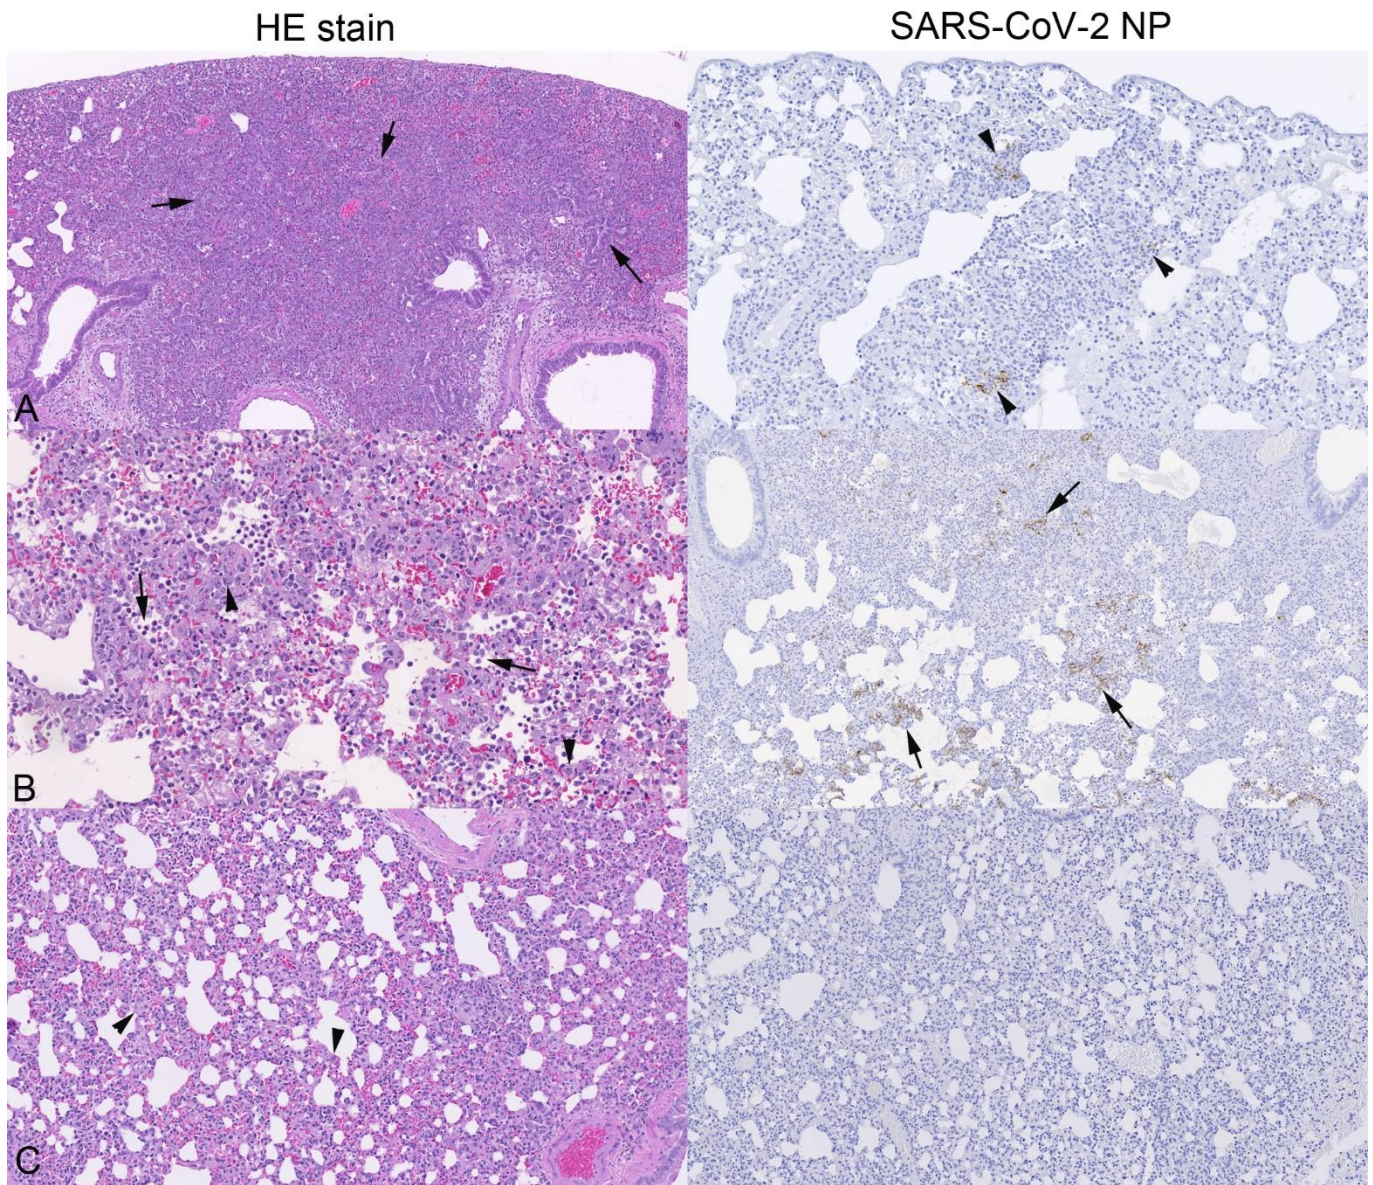

**Supplementary Figure S1.** Closer view of histological changes and viral antigen expression in the lungs of hamsters intranasally infected with SARS-CoV-2 (A) or treated with saline (B) or RDV (C) and housed together as a group of 5 hamsters with an infected hamster; animals were euthanized and examined at day 7. Left column: HE stained sections, right column: consecutive sections stain for SARS-CoV-2 nucleoprotein (NP), immunohistology, hematoxylin counterstain. **A.** Infected hamster (#3). Consolidated area (corresponding to area indicated by the arrow in Figure 6A) with multifocal type II pneumocytes/bronchiolar epithelial hyperplasia (arrows). Viral antigen expression is seen in a few alveolar epithelial cells (AEC) and macrophages (arrowheads). **B.** Saline treated hamster (#4). Focal area (corresponding to area indicated by the arrow in Figure 6B) of alveoli that contain desquamated AEC and/or alveolar macrophages (arrows) and exhibit activated type II pneumocytes (arrowheads). Viral antigen expression is seen in AEC in multiple patches of alveoli (arrows). **C.** RDV treated hamster (#1). **C.** RDV treated hamster (#1). The parenchyma appears cell rich, consistent with increased interstitial cellularity. There are activated type II pneumocytes (arrowheads). There is no evidence of viral antigen expression (right image).
